# Supplementary material for: Treatment of nonwoven polypropylene to increase adsorption of SARS-CoV-2 spike protein
Source: Royal Society of Chemistry journal article supplement (doi:10.1039/d2ma00614f), 2022-01-01
Supplement: d2ma00614f1.pdf [file d2ma00614f1.pdf]

## Supplemental Information

### Methods

#### Spike Protein Elisa

Samples were stored in ambient conditions for 14 days to simulate a brief period of storage before testing. Prior to ELISA studies, all samples were sterilized using sterile PBS and incubated in protein solution (1 µg/ml) for 2 h using a low attachment well plate. Protein solution was also incubated in empty wells as a positive control (the least adsorption possible). After this, the supernatants were collected and diluted 200-fold with assay buffer to obtain a protein solution in the standard curve range. The standard curve was obtained previously using the standards provided by the manufacturer (Sinobiological). The solutions' concentrations were then measured following the ELISA protocol. 100 µl of each diluted solution was added to the wells and incubated for 2 hrs. The wells were washed 4 times with Wash Buffer and 100 µl of Detection Antibody was added. After 1 hr of incubation, the antibody was aspirated and the wells were washed 4 times. 100 µl of TMB substrate solution was then added, followed by 20 mins incubation in dark environment. 100 µl of Stop Solution was then added and the optical density of each well was immediately measured at 450 nm. The concentrations were calculated using the standard curve and the values were subtracted from the positive control to obtain the amount of protein adsorbed on each surface.

We used the spike protein 40591-V08H SARS-CoV-2 (2019-nCoV) Spike S1-His Recombinant Protein (HPLC-verified) in the ELISA study. These were monomer proteins produced in HEK293 cells. The capture antibody employed was 40140-D003 against the RBD (Sinobiological Catalog# 40150-V08B2).

# Results

## Contact angle data for days 7, 14, and 21

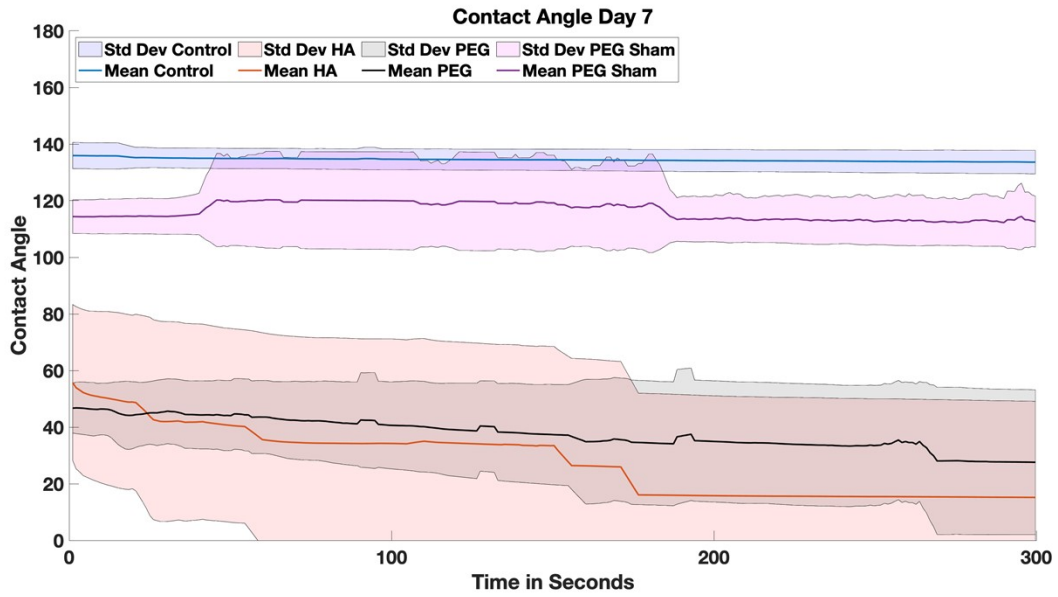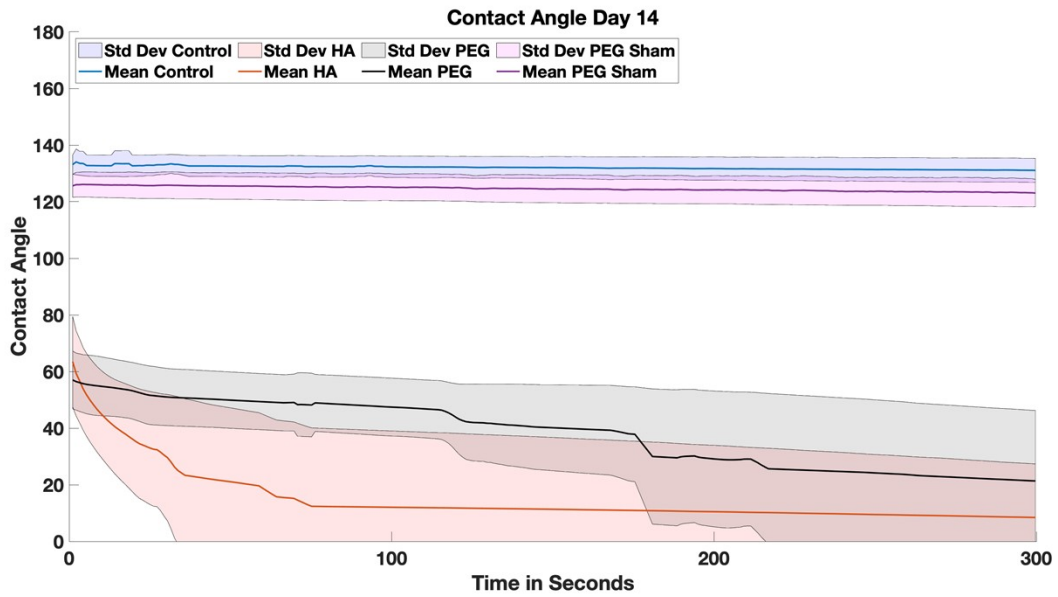

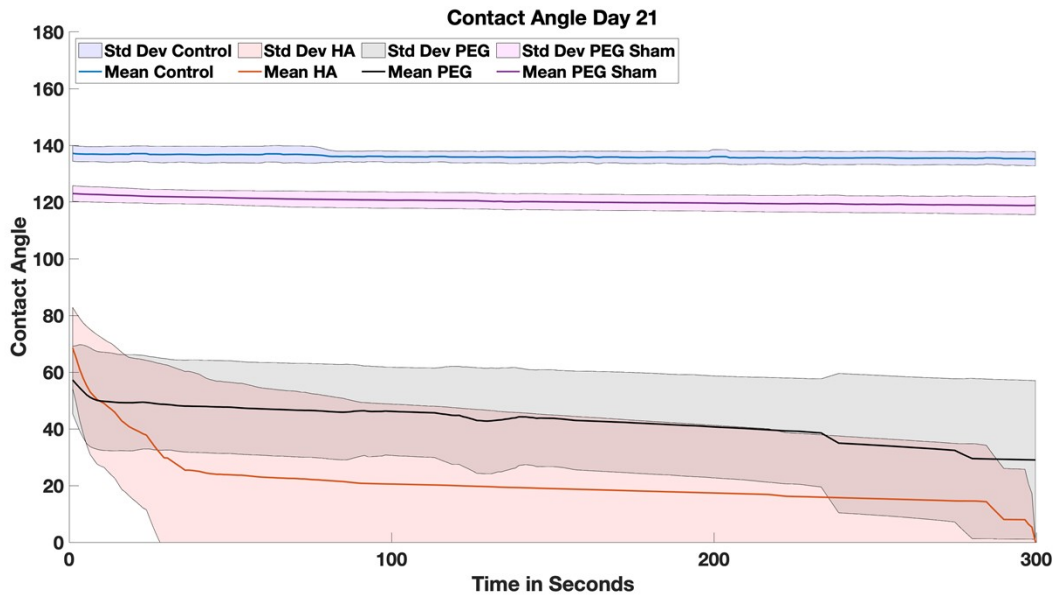

## XPS data for days 7, 14, and 21

### Day 7 XPS data

| Sample  | Carbon | Oxygen | Nitrogen | Silicon | Others       |
|---------|--------|--------|----------|---------|--------------|
| PEG     | 77.21  | 22.06  | 0        | 0.73    | 0            |
| SHAM    | 92.11  | 7.17   | 0        | 0.71    | 0            |
| Control | 93.92  | 3.71   | 0        | 2.37    | 0            |
| HA      | 70.63  | 24.39  | 3.5      | 0       | 1.48<br>(Na) |

### Day 14 XPS data

| Sample  | Carbon | Oxygen | Nitrogen | Silicon | Others   |
|---------|--------|--------|----------|---------|----------|
| PEG     | 92.38  | 7.62   | 0        | 0       | 0        |
| SHAM    | 70.29  | 23.7   | 0        | 6.01    | 0        |
| Control | 90.09  | 6.43   | 0        | 3.49    | 0        |
| HA      | 67.85  | 24.44  | 5.97     | 0       | 1.74(Na) |

### Day 21 XPS data

| Sample  | Carbon | Oxygen | Nitrogen | Silicon | Others |
|---------|--------|--------|----------|---------|--------|
| PEG     | 92.95  | 4.65   | 0        | 2.4     | 0      |
| SHAM    | 72.97  | 25.65  | 0        | 1.38    | 0      |
| Control | 92.67  | 5.42   | 0        | 1.91    | 0      |
| HA      | 63.41  | 26.95  | 0.67     | 8.97    | 0      |
